# Supplementary material
Source: Springer Nature journal article supplement (https://www.springermedizin.de/resource/supplementary/12936_2013_2868_MOESM7_ESM.pdf/9544462)

Kilifi, Kenya

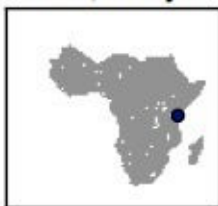

Bamako, Mali

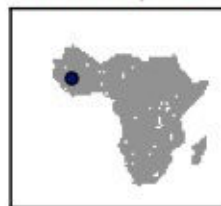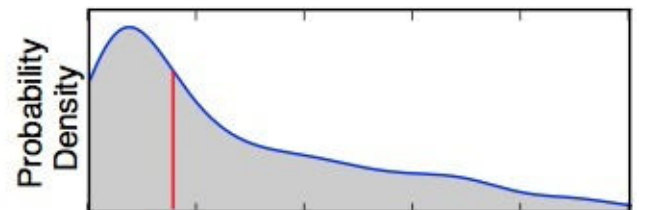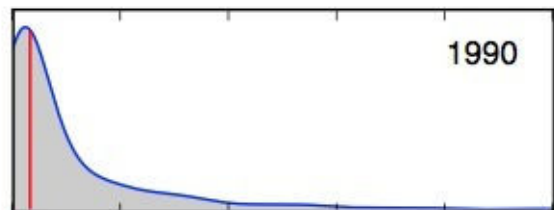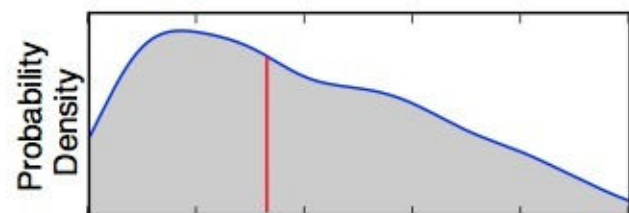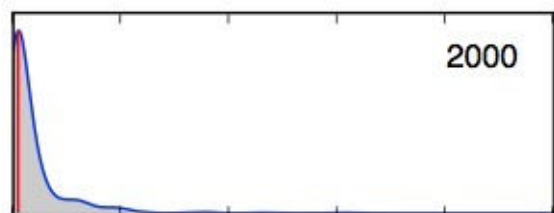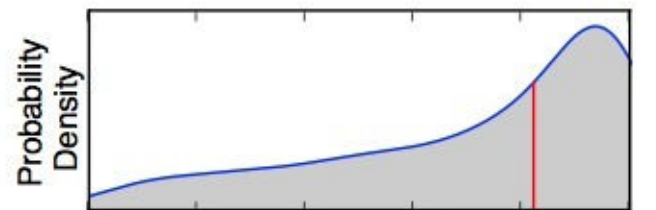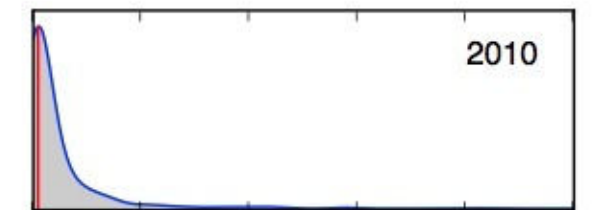

dhps540E prevalence

dhps540E prevalence

Supplement: MOESM7 [file 9544462]
